# Supplementary material
Source: PubMed Central journal article supplement (PMC6874498)
Supplement: EMS84919-supplement-Supplementary_Fig__1.pdf [file EMS84919-supplement-Supplementary_Fig__1.pdf]

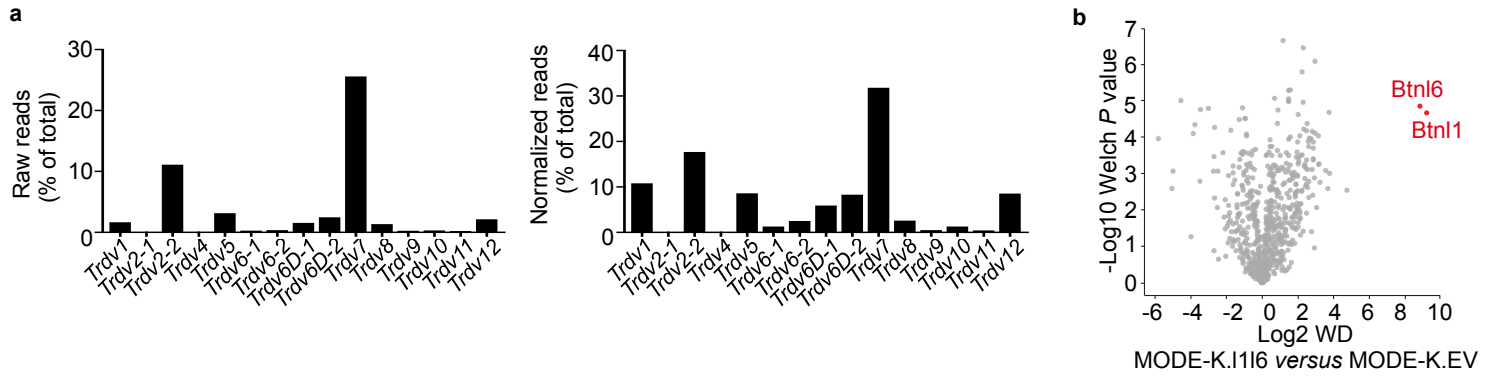

**Supplementary Fig. 1. Delta chain usage of V $\gamma$ 7<sup>-</sup> IEL, and Btn1+6 co-precipitation**

**a**, TCR analysis of *Trdv* gene usage by V $\gamma$ 7<sup>-</sup> IEL sorted in parallel to the V $\gamma$ 7<sup>+</sup> IEL from Fig. 1a,b,c. Data derived from cells sorted from pooled mice IEL ( $n = 8$ ). Representative of three independent sorts. **b**, Volcano plot representation of a mass-spectrometry analysis following anti-Flag pull-down on lysates from MODE-K.EV or MODE-K.1116 cells. Data expressed as the mean Welch difference in protein intensities in MODE-K.1116 versus MODE-K.EV samples (x-axis; Welch difference, WD) and associated  $P$  values (y-axis) for each protein (represented by dots), from multiple mass-spectrometry analysis replicates ( $n = 3$ )

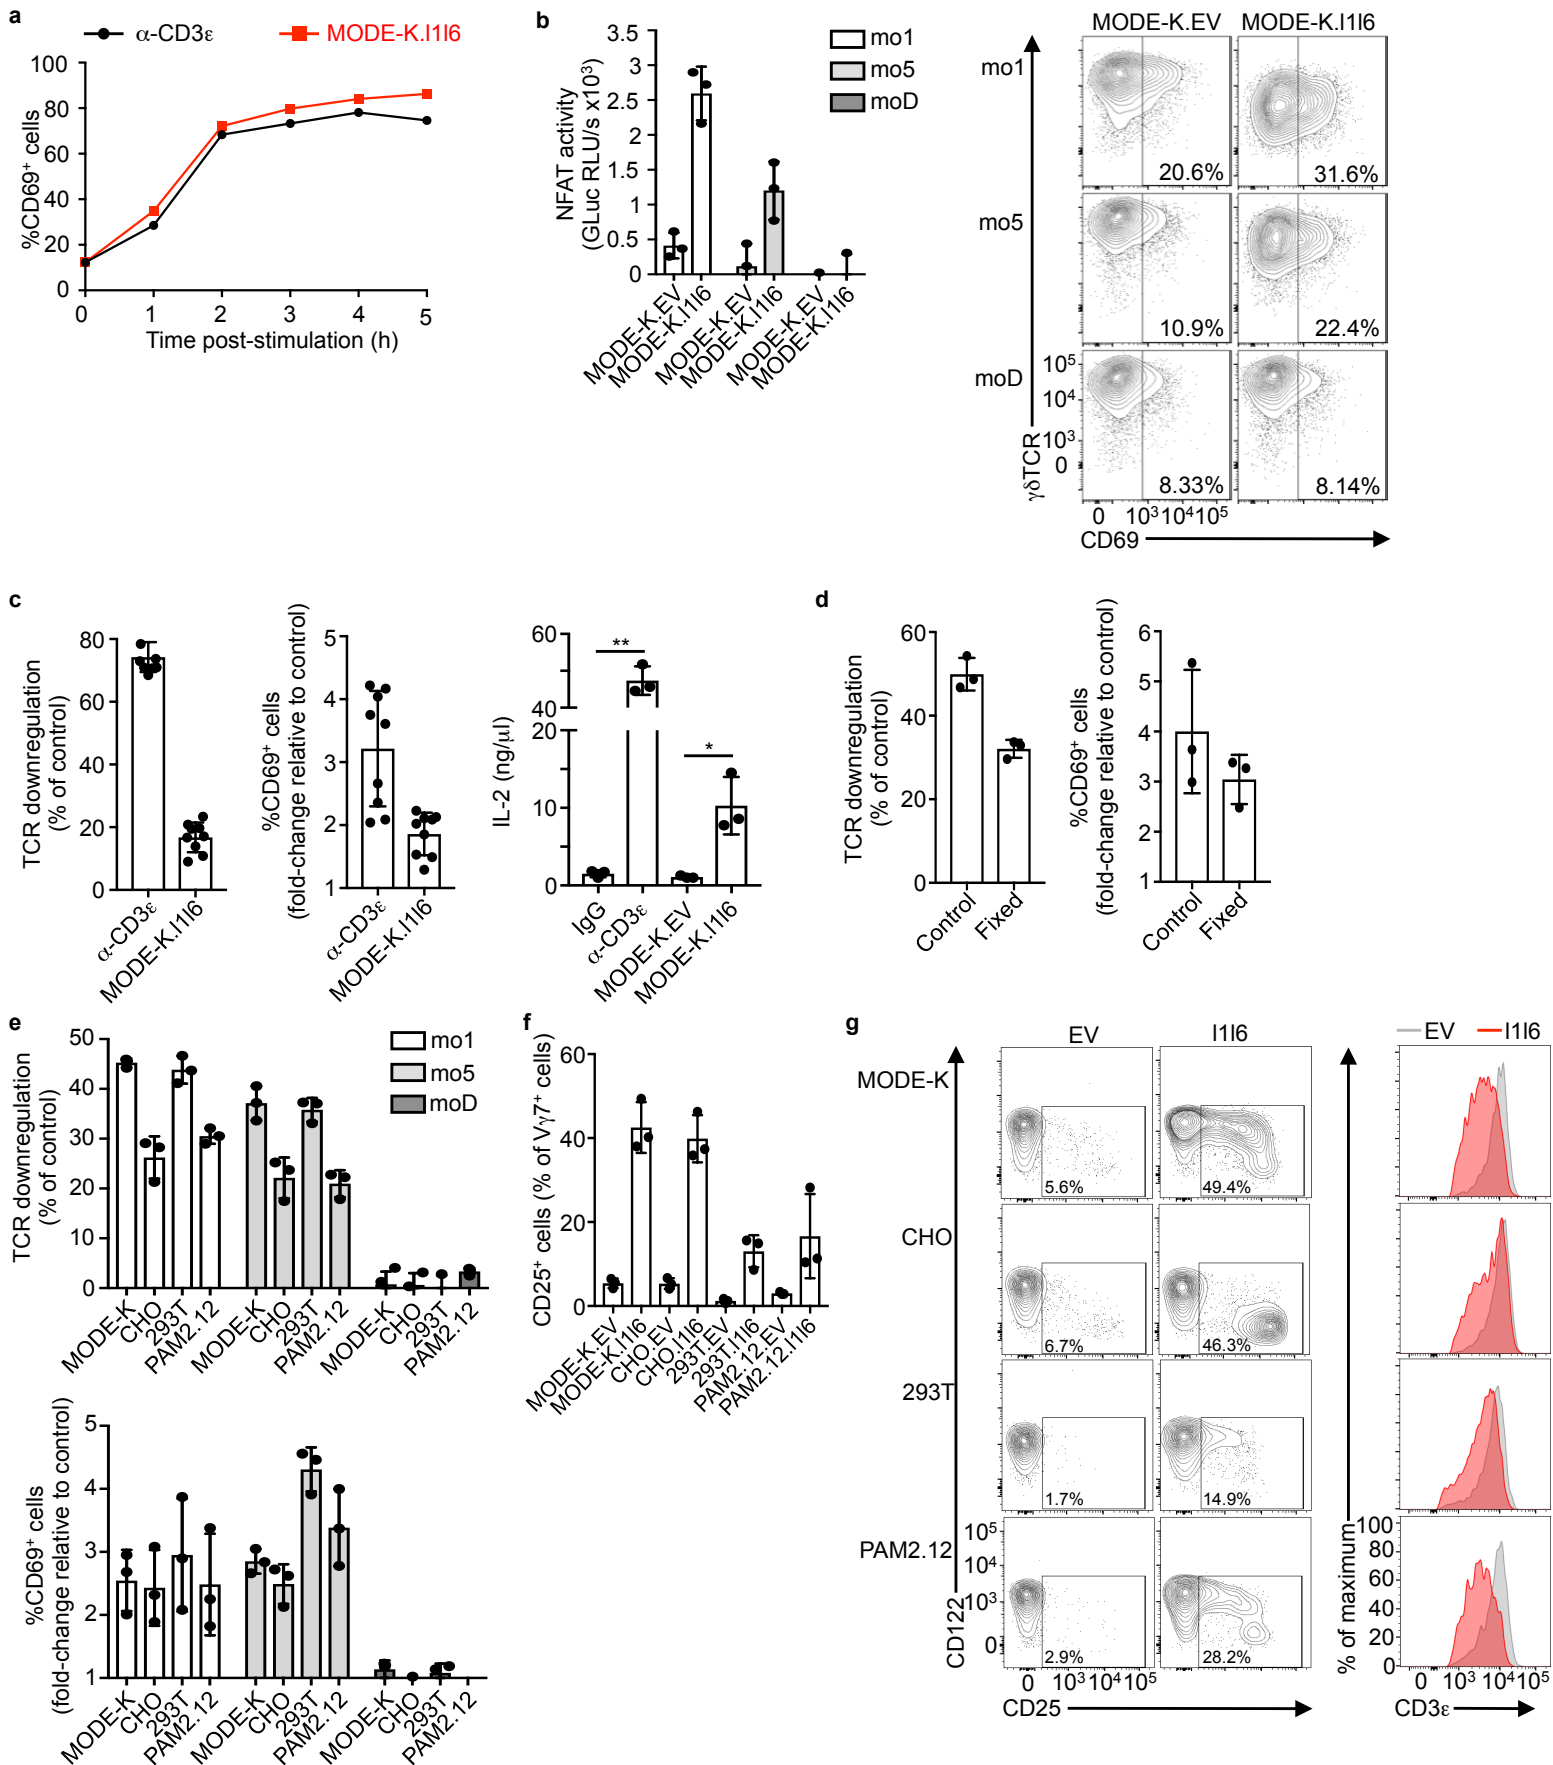

**Supplementary Fig. 2. Requirements for a Btln1+6-dependent response.**

**a**, Flow cytometry analysis of the proportion of CD69<sup>+</sup> J76-mo5 cells (y-axis) co-cultured with  $\alpha$ -CD3 $\epsilon$  or MODE-K.1116 over time (x-axis). Data expressed as mean of two experiments. **b**, Quantification of NFAT promoter activity (left) in JRT3.NFAT-GLuc cells transduced with the indicated TCRs and co-cultured with MODE-K.EV or MODE-K.1116 cells for 24 h. Gaussia Luciferase (GLuc) was measured in supernatants (RLU/s, relative light units per second). Data expressed as mean $\pm$ s.d. ( $n = 3$ ) and representative of two experiments. Cells were analysed in parallel by flow cytometry for  $\gamma\delta$ TCR and CD69 expression (right) as a positive control of the response to MODE-K.1116 cells. **c**, Flow cytometry analysis of TCR downregulation (left), CD69 upregulation (centre) and ELISA quantification of IL-2 production (right) by E6.1-mo5 cells co-cultured with the indicated antibodies or cells lines. Flow cytometry data acquired after 5 h, expressed as mean $\pm$ s.d., normalized to IgG or MODE-K.EV; pooled from nine independent experiments. ELISA data acquired after 24 h, expressed as mean $\pm$ s.d. ( $n = 3$ ); representative of three experiments. **d**, Flow cytometry analysis of TCR downregulation (left) and CD69 upregulation (right) by J76-mo5 cells co-cultured with untouched (control) or fixed MODE-K.1116 cells for 5 h. Data expressed as mean $\pm$ s.d., normalized to MODE-K.EV; pooled from three independent experiments. **e**, Flow cytometry analysis of TCR downregulation (top) and CD69 upregulation (bottom) by J76-mo1, -mo5 or -moD cells co-cultured the indicated cell lines transduced with Btln1+6. Data expressed as mean $\pm$ s.d., normalized to corresponding cell line transduced with empty vector; pooled from three independent experiments. **f**, Flow cytometry analysis of the proportion of CD25<sup>+</sup> cells in V $\gamma$ 7<sup>+</sup> IEL co-cultured with the indicated cell lines overnight. Data from individual mice expressed as mean $\pm$ s.d. ( $n = 3$ ). **g**, Flow cytometry analysis of CD25, CD122 and CD3 $\epsilon$  expression by V $\gamma$ 7<sup>+</sup> IEL co-cultured with the indicated cell lines transduced with EV or Btln1+6 (I116) overnight. Representative of co-cultures from individual mice ( $n = 3$ ), related to (f).

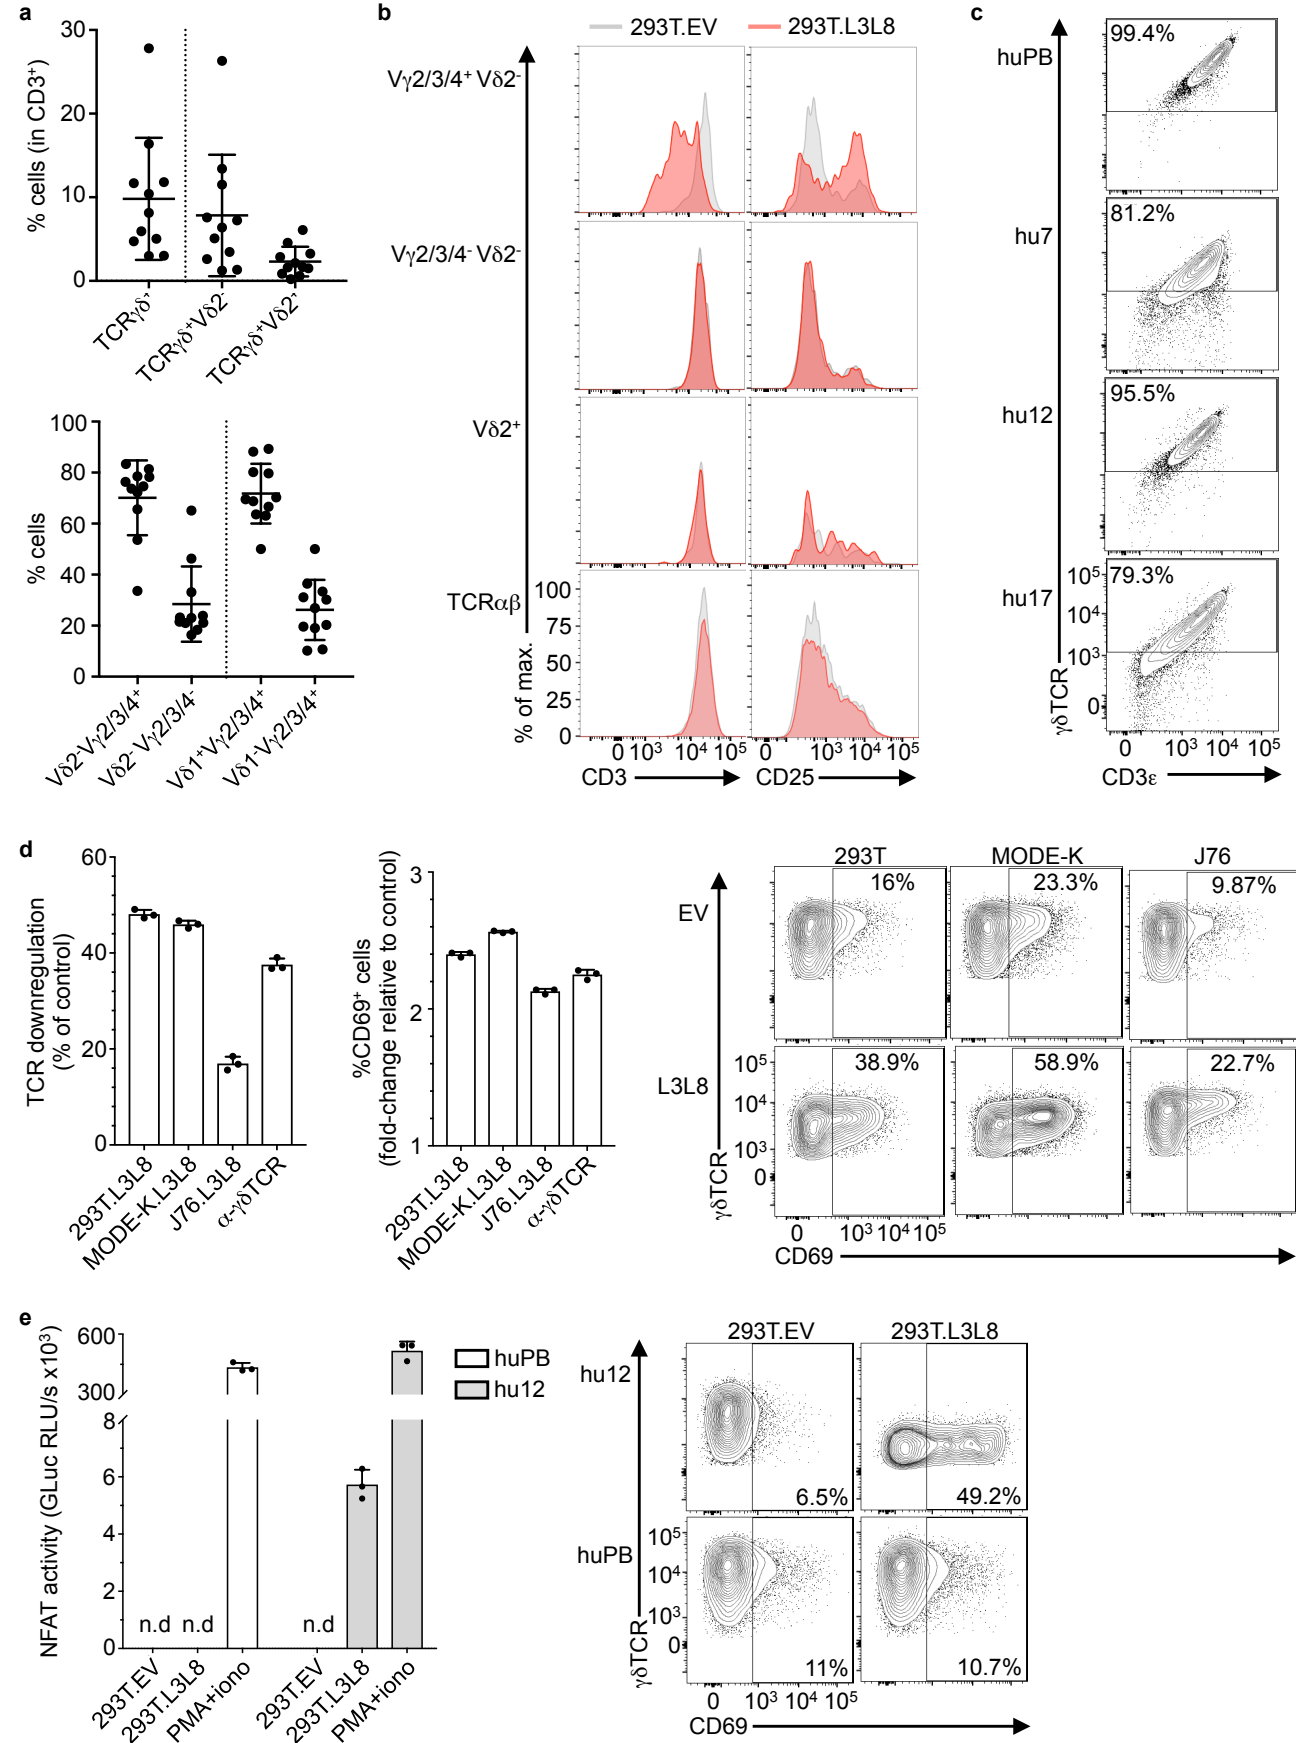

**Supplementary Figure 3. The transfer of V $\gamma$ 4<sup>+</sup> TCRs from responding IELs confers reactivity to BTNL3+8.**

**a**, Flow cytometry analysis of colonic  $\gamma\delta$  T cell composition, as proportion of total CD3<sup>+</sup> cells (top); V $\gamma$ 2/3/4 chain usage of TCR $\gamma\delta$ <sup>+</sup>V $\delta$ 2<sup>-</sup> cells and V $\delta$  chain usage of V $\delta$ 2-V $\gamma$ 2/3/4<sup>+</sup> cells (bottom), after a 5 days culture. Data expressed as mean $\pm$ s.d. of independent patient biopsies ( $n = 11$ ). **b**, Flow cytometry analysis of CD3 and CD25 expression by the indicated human colonic lymphocyte subsets after co-culture with 293T.EV (grey) or .L3L8 (red) overnight. Representative of independent patient samples ( $n = 11$ ). **c**, Flow cytometry analysis of CD3 $\epsilon$  and  $\gamma\delta$ TCR expression by J76 cells transduced with the indicated TCRs, 96h post-transduction. Representative of three independent experiments. **d**, Flow cytometry analysis of TCR downregulation (left) and CD69 upregulation (centre) by J76-hu12 cells co-cultured with the indicated cells lines or  $\alpha$ - $\gamma\delta$ TCR antibody for 5 h. Data expressed as mean $\pm$ s.d ( $n = 3$ ), normalized to the matching cell lines transduced with empty vector, or control IgG. Corresponding raw flow cytometry plots are shown on the right. Representative of two (J76) or three (MODE-K) independent experiments (293T). **e**, Quantification of NFAT promoter activity (left) in JRT3.NFAT-GLuc cells transduced with the indicated TCRs and co-cultured with 293T.EV or 293T.L3L8 cells, or stimulated with PMA and ionomycin (PMA+iono) for 24 h. Gaussia luciferase (GLuc) was measured in supernatants (RLU/s, relative light units per second). Data expressed as mean $\pm$ s.d ( $n = 3$ ); n.d, non-detectable above background. Cells were analysed in parallel by flow cytometry for  $\gamma\delta$ TCR and CD69 expression (right) as a positive control of the response to 293T.L3L8 cells. Representative of two independent experiments.

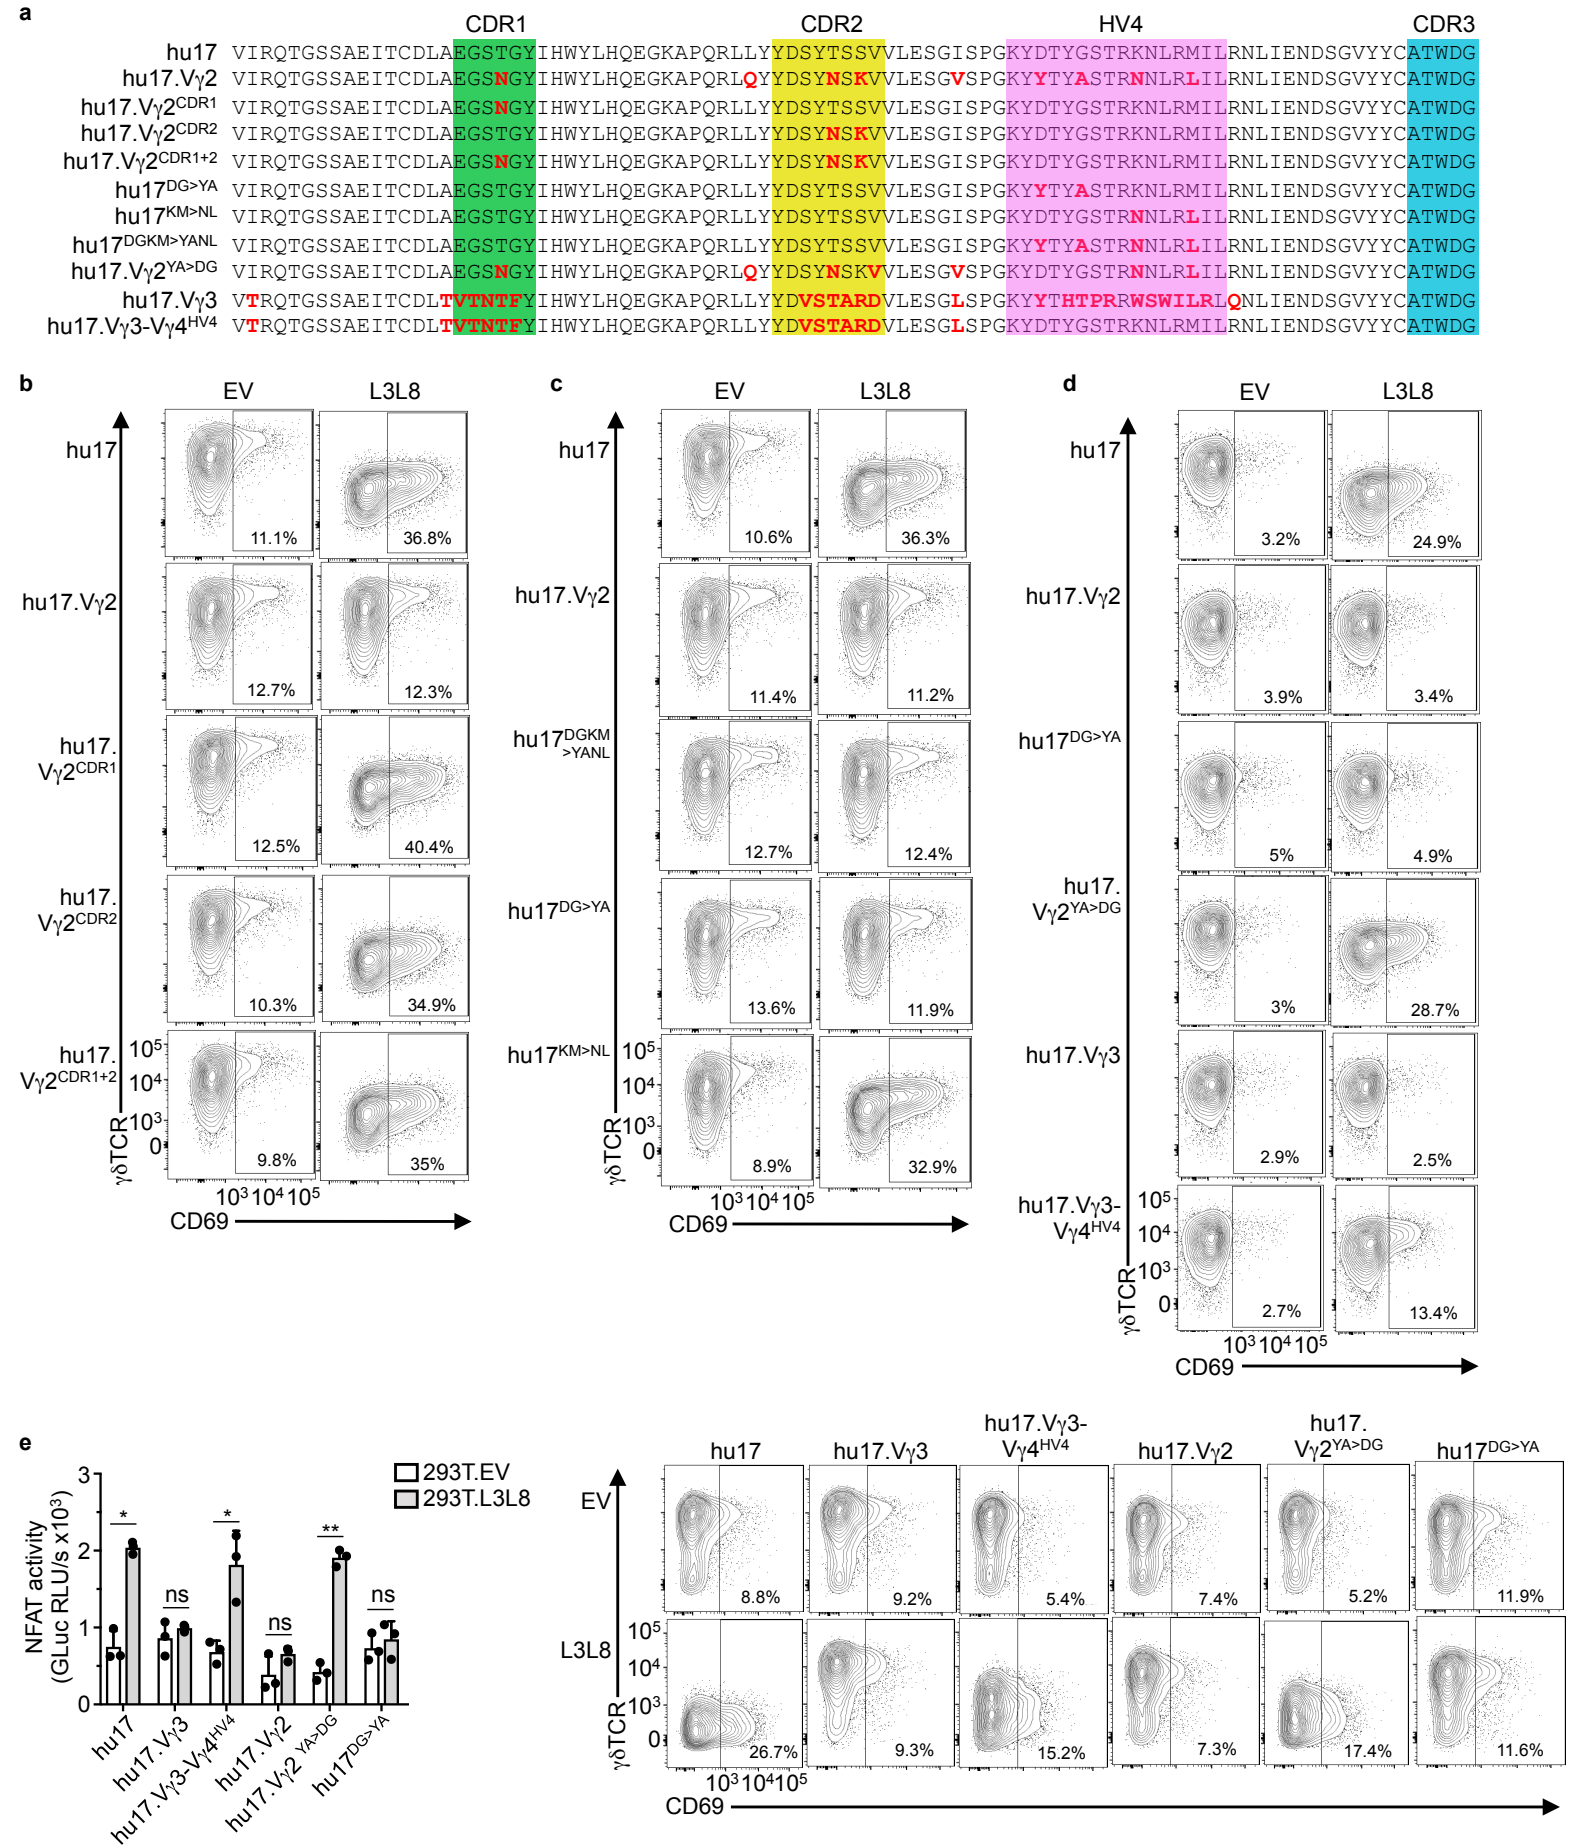

**Supplementary Fig. 4. hu17 TCR variants and their responses to L3L8**

**a**, Alignment of hu17 variants tested in Fig. 4b,c,d. Differences from the wild-type V $\gamma$ 4 sequence are in bold red. CDR1/2/3 and HV4 are highlighted in green, yellow, cyan and pink, respectively. **b,c,d**, Flow cytometry analysis of  $\gamma\delta$ TCR and CD69 expression by J76 cells transduced with the indicated hu17 TCR variants and co-cultured with 293T.EV or 293T.L3L8 cells for 5 h. Representative of individual co-cultures ( $n = 3$ ), related to Fig. 4b,c,d. **e**, Quantification of NFAT promoter activity (left) in JRT3.NFAT-GLuc cells transduced with the indicated hu17 TCR variants and co-cultured with 293T.EV or 293T.L3L8 cells for 24 h. GLuc was measured in supernatants (RLU/s, relative light units per second). Data expressed as mean $\pm$ s.d. of individual co-cultures ( $n = 3$ ). \* $P < 0.05$ ; \*\* $P < 0.01$ ; ns, not significant. Cells were analysed in parallel by flow cytometry for  $\gamma\delta$ TCR and CD69 expression (right) as a positive control of the response to 293T.L3L8 cells.

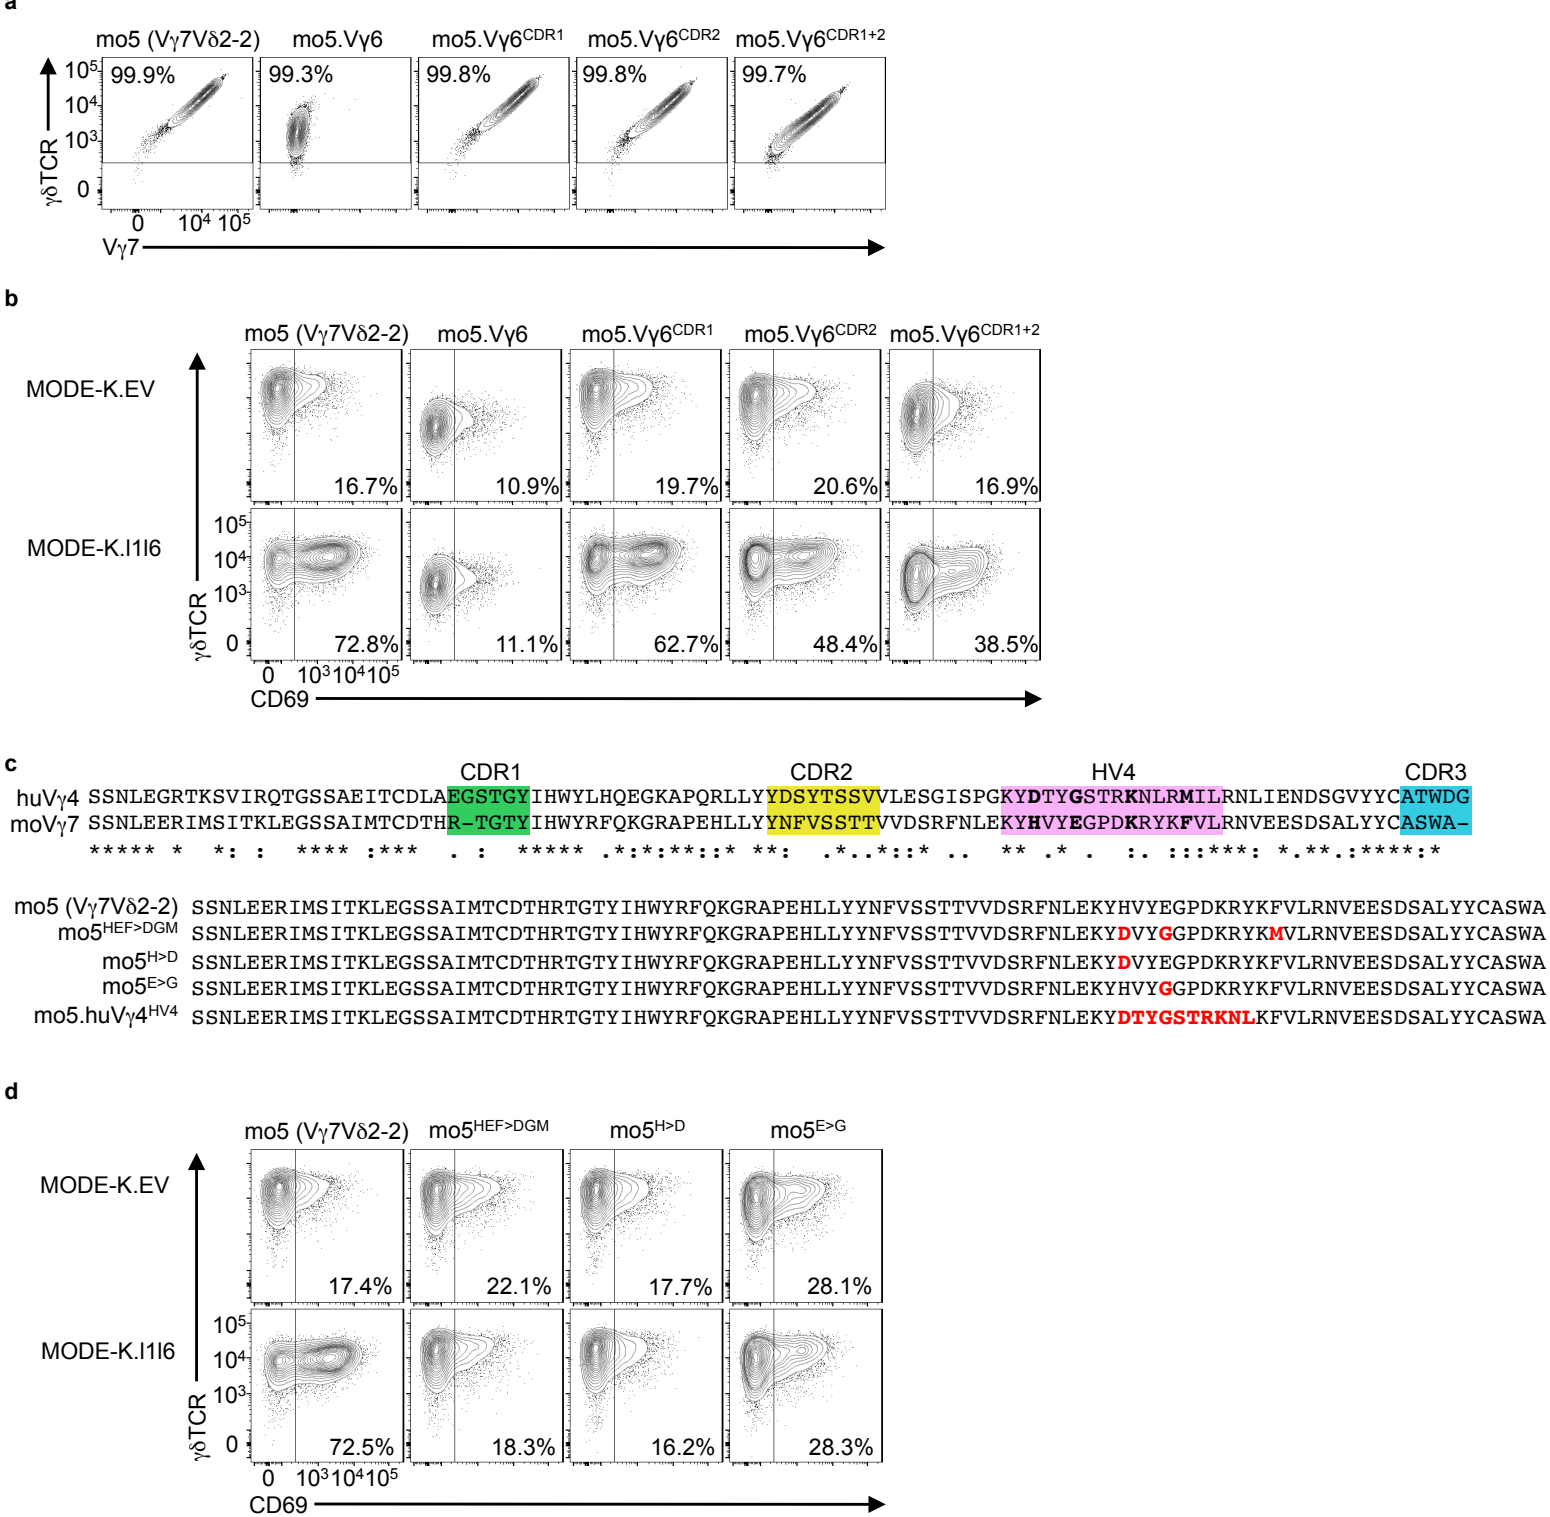

**Supplementary Fig. 5. HV4 is required for responses to human and murine BTNL/Btl**

**a**, Flow cytometry analysis of V $\gamma$ 7 and  $\gamma\delta$ TCR expression by J76 cells transduced with the indicated TCRs and sorted to ensure equivalent expression. Representative of three independent experiments. **b**, Flow cytometry analysis of  $\gamma\delta$ TCR and CD69 expression by J76 cells transduced with the indicated TCRs and co-cultured with MODE-K.EV or MODE-K.1116 cells for 5 h. Representative of individual co-cultures ( $n = 3$ ), related to Fig. 5b. **c**, Alignments of mouse V $\gamma$ 7 with human V $\gamma$ 4 sequences (top; amino acids identified in Fig. 4c are bolded); and of mo5 variants tested in Fig. 5c,d (bottom; differences from wild-type V $\gamma$ 7 sequence in bold red). **d**, Flow cytometry analysis of  $\gamma\delta$ TCR and CD69 expression by J76 cells transduced with the indicated mo5 variants and co-cultured with MODE-K.EV or MODE-K.1116 cells for 5 h. Representative of individual co-cultures ( $n = 3$ ), related to Fig. 5c.

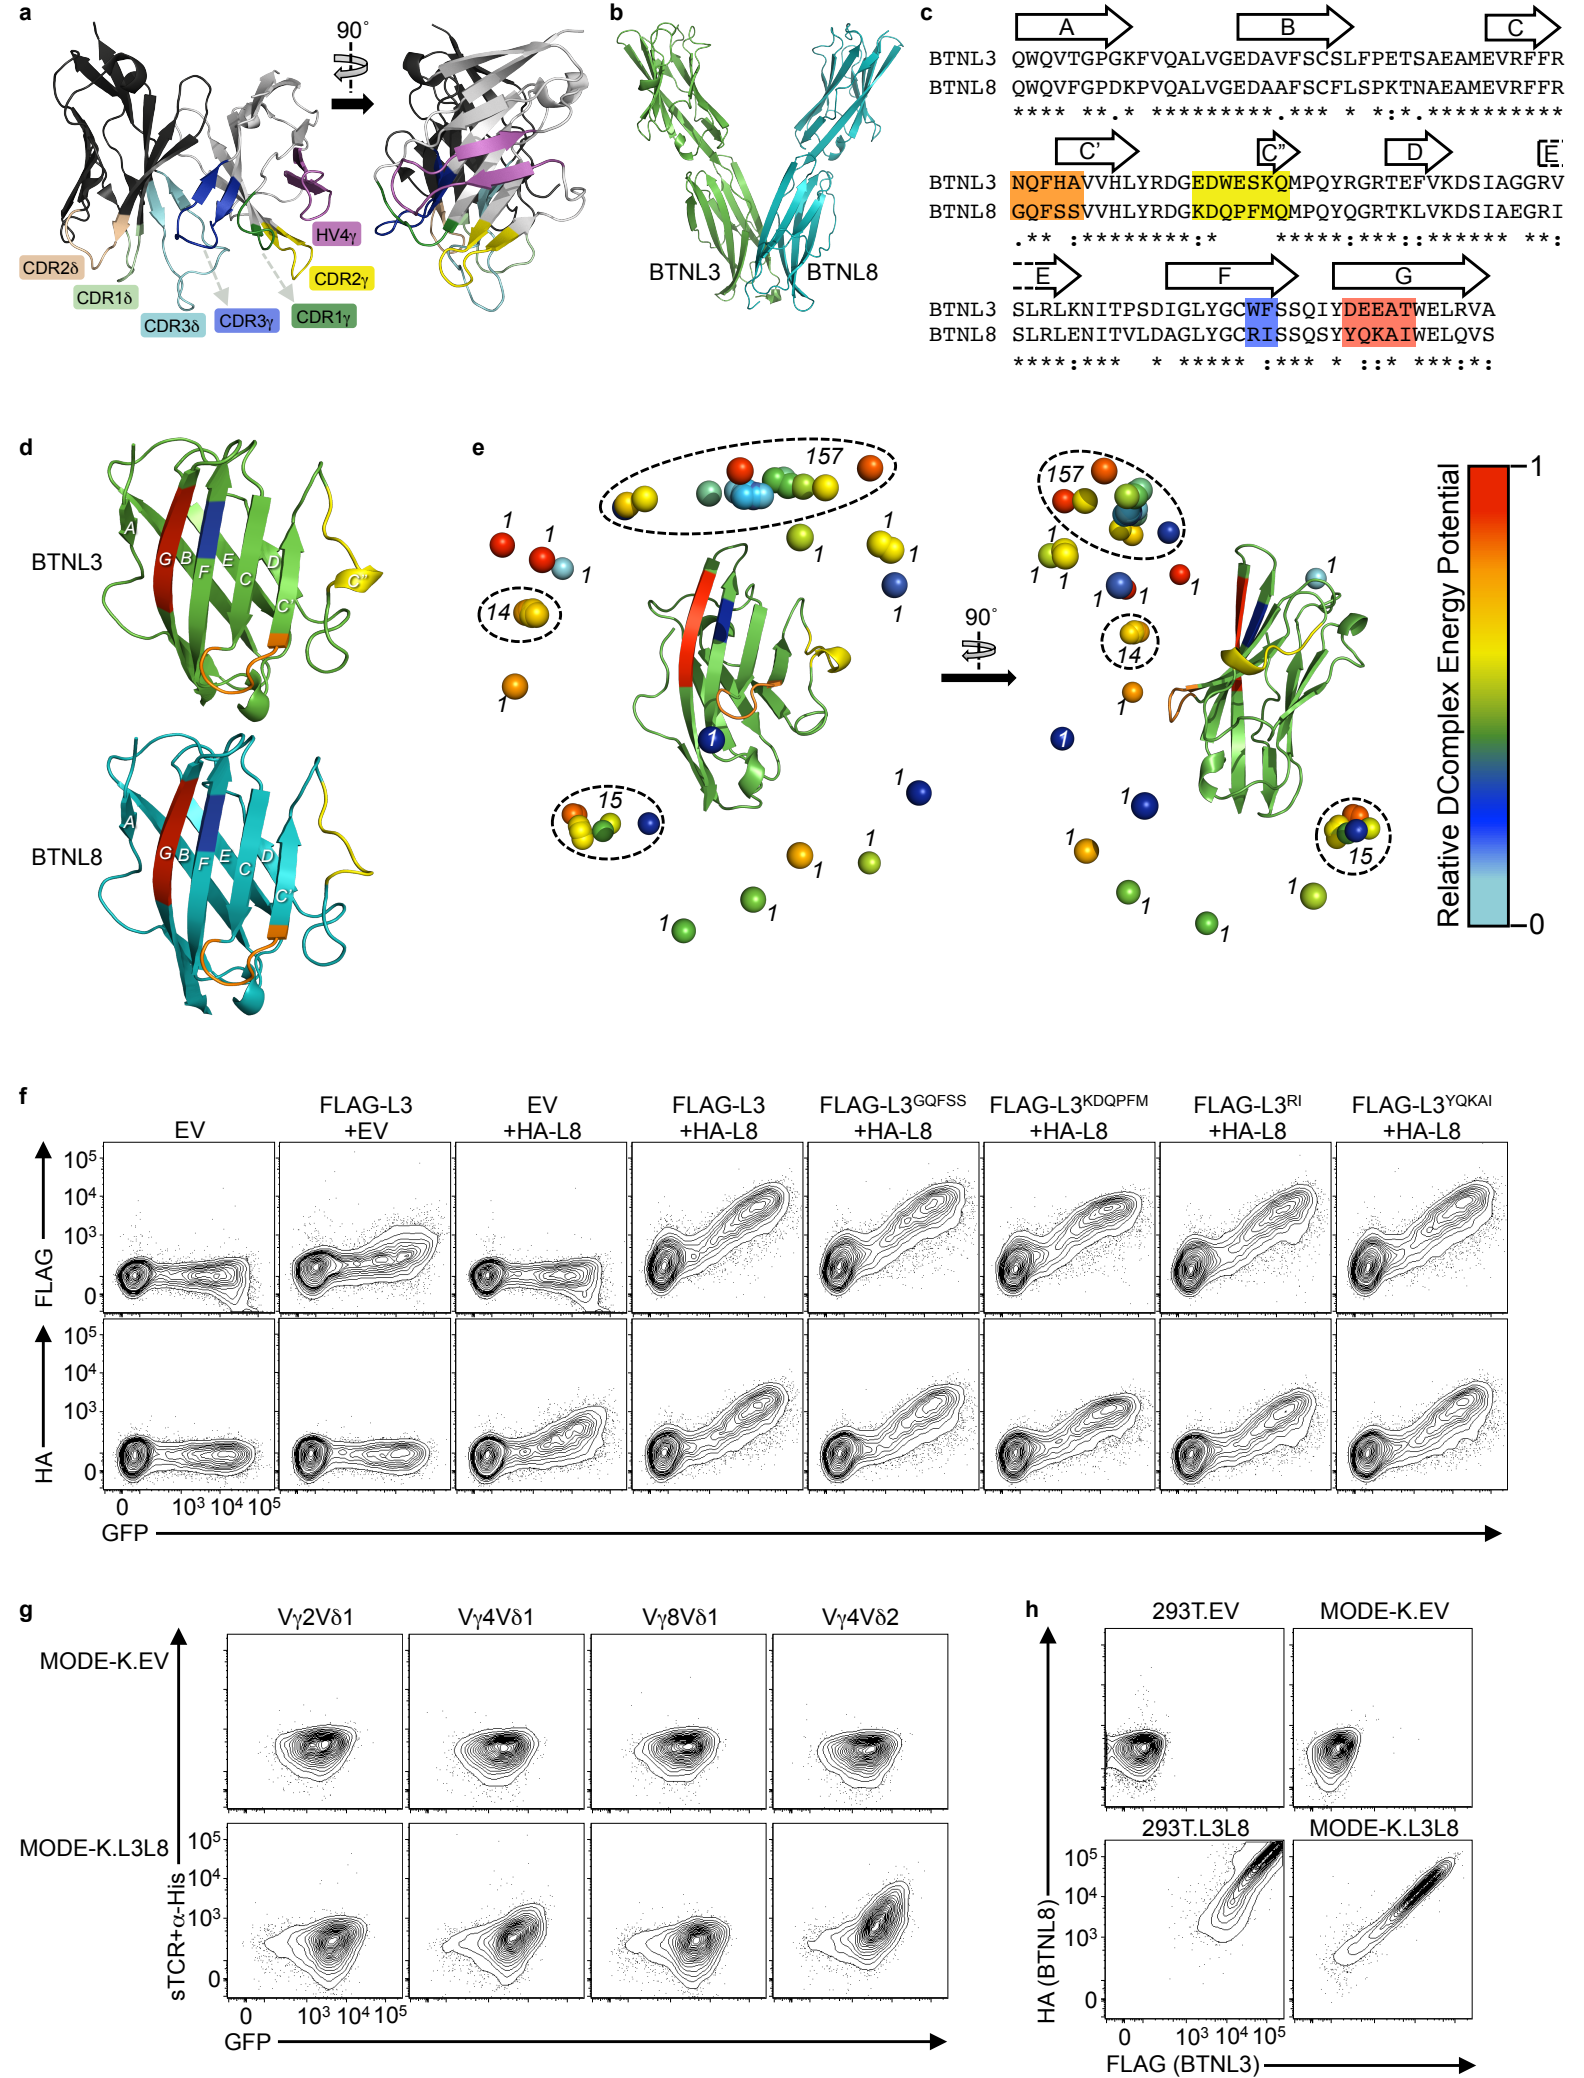

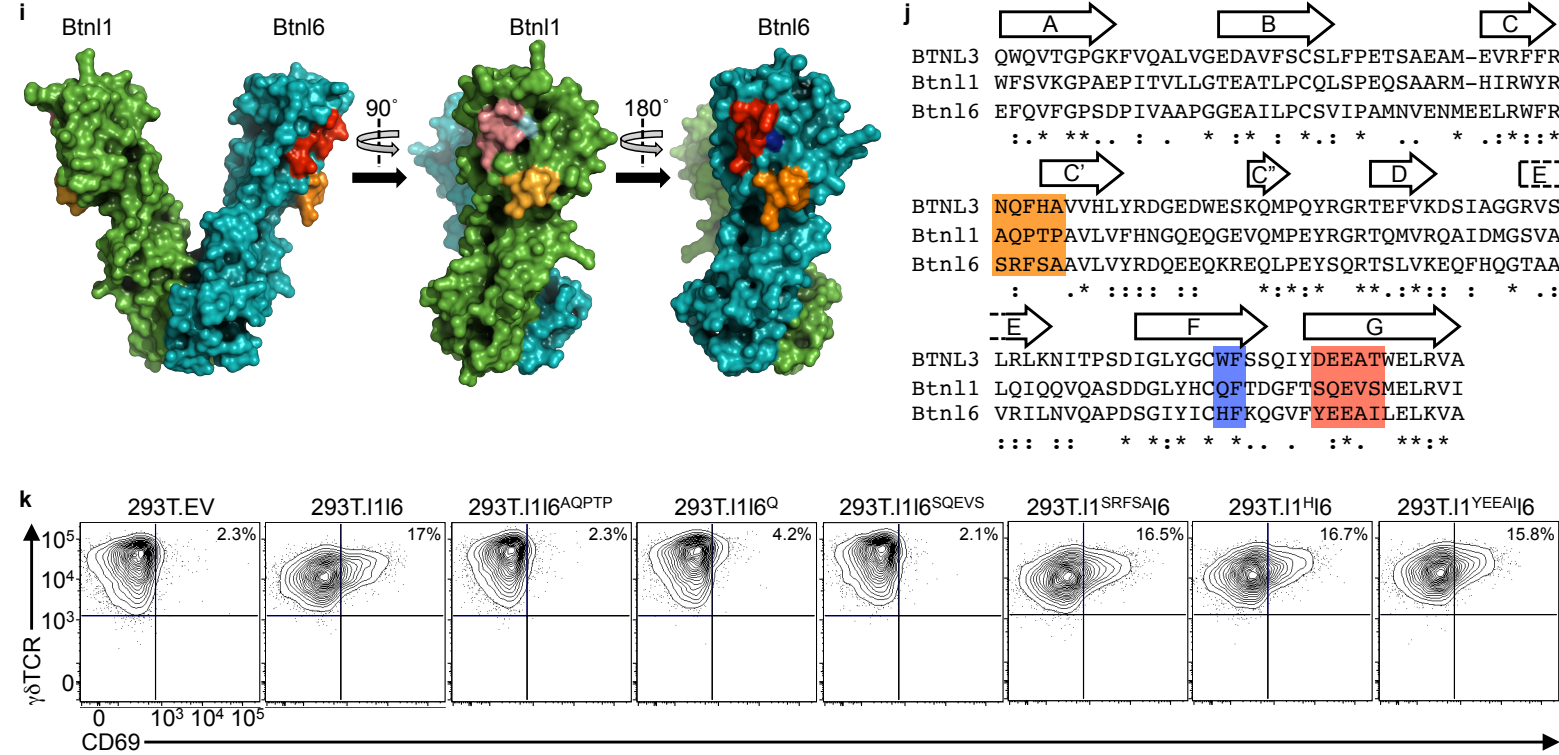

**Supplementary Figure 6. Stepwise determination of the Vγ4 / BTNL3 interaction model**

**a**, Cartoon representation of the crystal structure of a Vγ4Vδ1 TCR V-domains (from PDB 4MNG), with all CDRs and HV4γ highlighted. **b**, Cartoon representation of a BTNL3 (green) / BTNL8 (teal) heterodimer model, derived with 3D-JIGSAW from a BTN3A1 homodimer (PDB 4F80). **c**, Alignment of the IgV-domain sequences of BTNL3 and BTNL8. Canonical Ig-fold β-strands [A,B,C,C',C'',D,E,F,G] are indicated with arrows. Solvent-exposed residues that are significantly different are highlighted in orange [NQFHA/GQFSS], yellow [EDWESK/KDQPFM], blue [WF/RI], and red [DEEAT/YQKAI]. **d**, Cartoon representation of the IgV-domains of BTNL3 (green) and BTNL8 (teal) from (b), with the same annotation as in (c). **e**, Cartoon representation of the results of 200 unrestricted docking simulation runs in SwarmDock, between the IgV-domain of BTNL3 (green) and the TCR Vγ4Vδ1 V-domains (PDB 4MNG). Each sphere represents the centroid of the TCR (numbers in italic indicate the number of solutions for groups) and are color-coded according to the relative energy between the docked poses (relative Docking Complex [DComplex] Energy Potential scale displayed on the right). Note that the IgV-domain of BTNL3 is rotated 45° counter-clockwise along the x-axis compared to (d). **f**, Flow cytometry analysis of FLAG-tagged BTNL3 and HA-tagged BTNL8 expression in 293T cells, 48 h post-transfection. Representative of three independent experiments. Related to Fig. 6c. **g**, Flow cytometry analysis of the binding of the indicated soluble TCRs (sTCR; pre-incubated with anti-6xHis tag antibody, α-His) after incubation with MODE-K.EV or MODE-K.L3L8 cells at 4°C for 1 h. Representative of three independent experiments. Related to Fig. 6e. **h**, Flow cytometry analysis of FLAG-BTNL3 and HA-BTNL8 expression on the indicated cell lines that were used for the sTCR staining experiments. Related to (g) and Fig. 6e. **i**, Surface representation of a heterodimeric Btnl1 (green) / Btnl6 (teal) model, derived with 3D-JIGSAW from a BTN3A1 homodimer (PDB 4F80). Candidate CFG face motifs corresponding to the ones identified in BTNL3 (see Fig. 6b,c; and below) are highlighted in orange (AQPTP/SRFSFA), blue (QF/HF), and red (SQEV/SYEEAI). **j**, Alignment of the IgV-domain sequences of BTNL3, Btnl1 and Btnl6. Canonical Ig-fold β-strands [A,B,C,C',C'',D,E,F,G] are indicated with arrows. Candidate motifs are highlighted using the same colour-coding as in (i). **k**, Flow cytometry analysis of γδTCR and CD69 expression by J76-mo5 cells co-cultured with 293T cells expressed the indicated constructs for 5h. Representative of three independent experiments. Related to Fig. 6g.

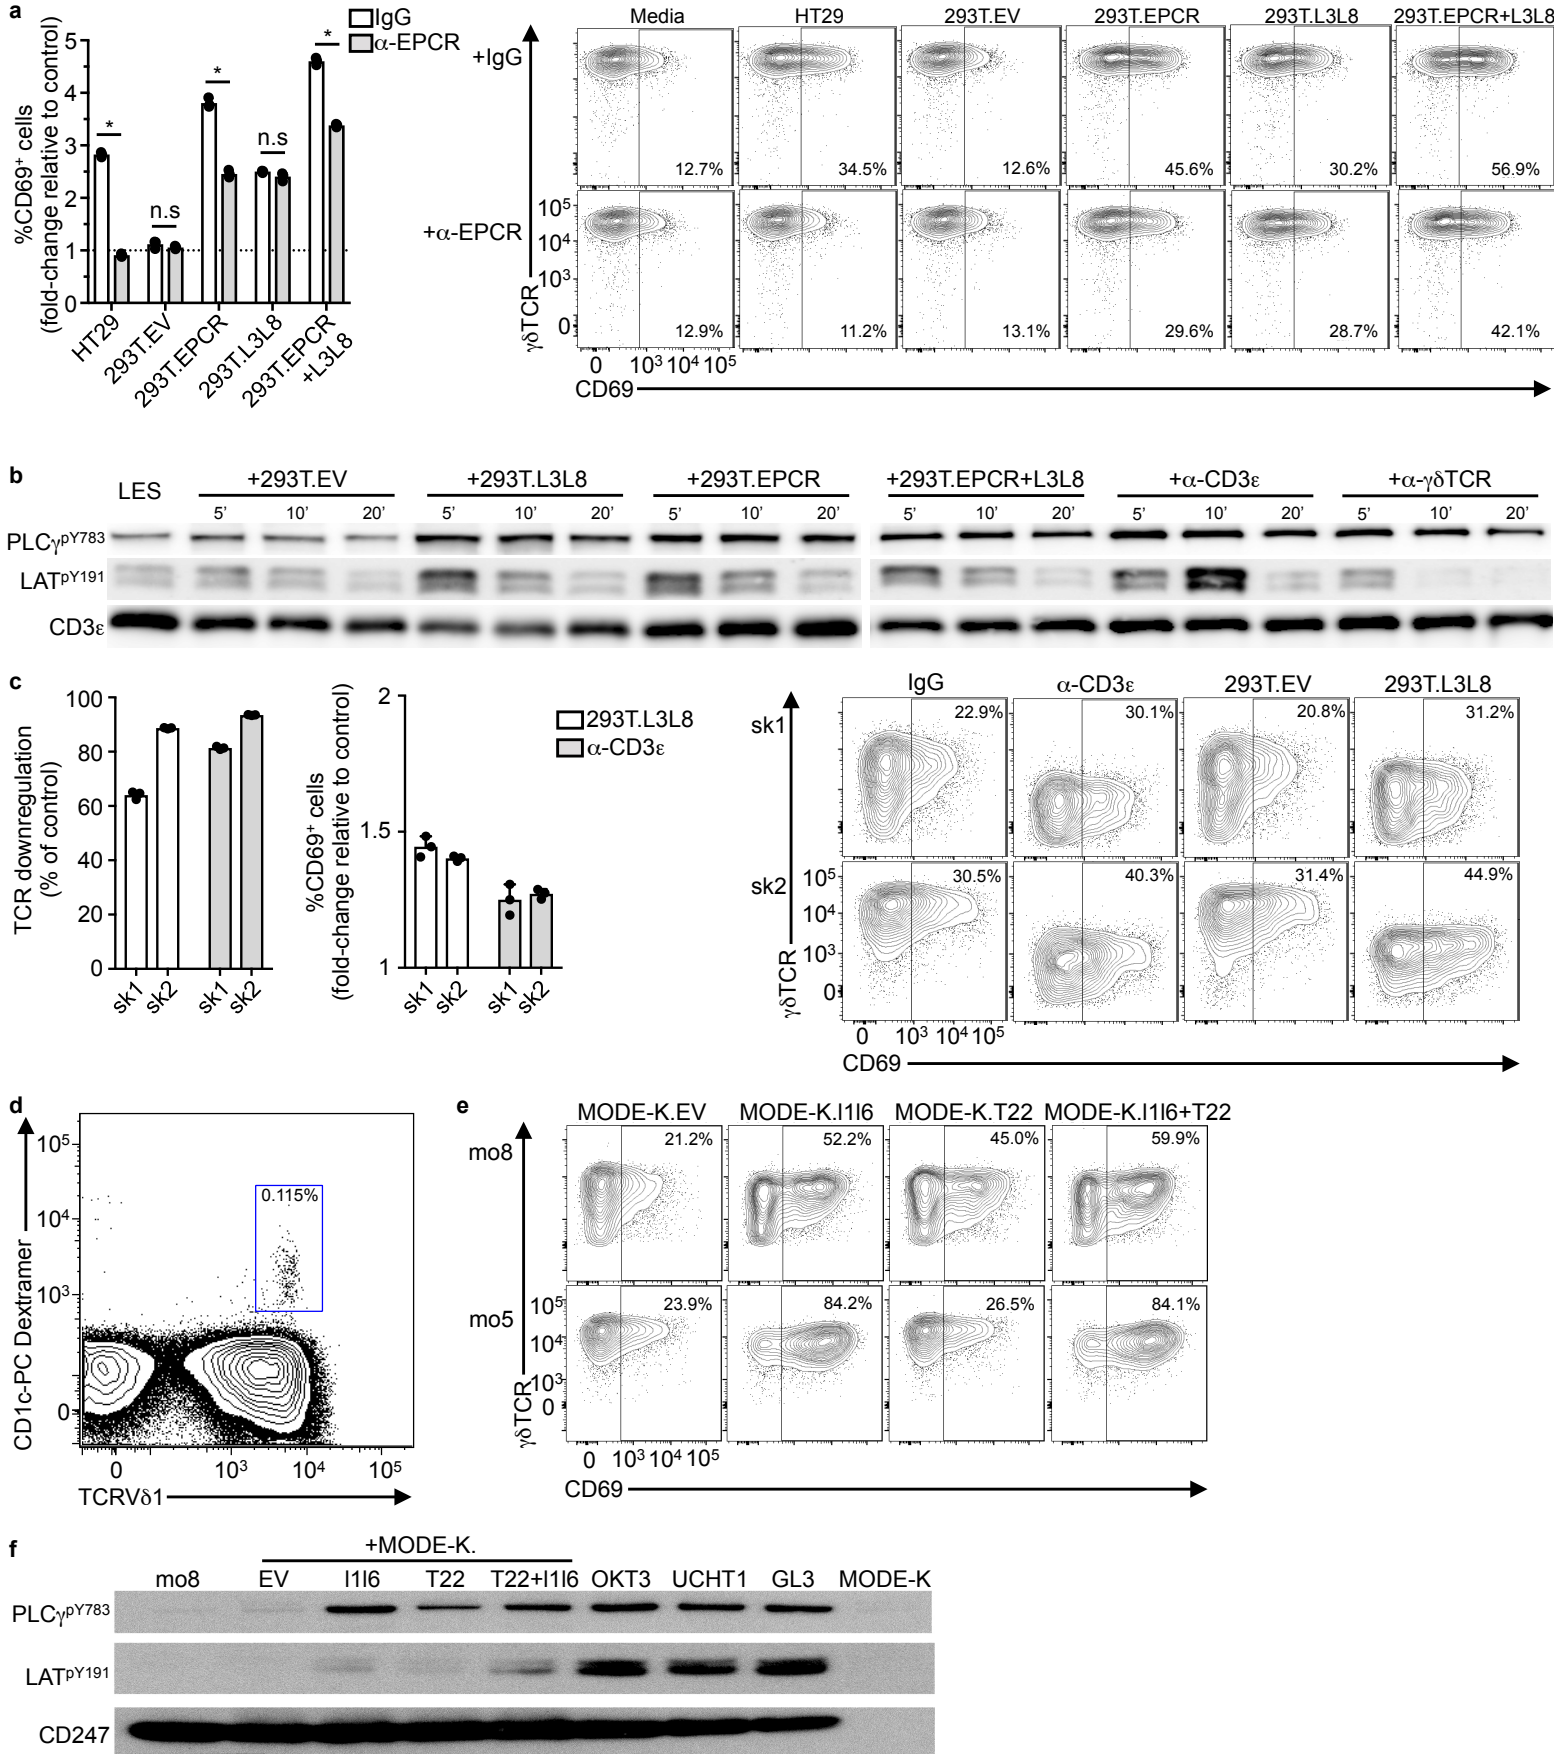

**Supplementary Figure 7. Dual reactivity of human and mouse  $\gamma\delta$ TCRs**

**a**, Flow cytometry analysis of CD69 upregulation (left) by JRT3-LES cells co-cultured with the indicated cell in the presence of control IgG or  $\alpha$ -EPCR antibodies (10  $\mu$ g/mL) for 3 h. Data expressed as mean $\pm$ s.d. of the proportion of CD69<sup>+</sup> cells in individual co-cultures ( $n = 3$ ). Corresponding raw flow cytometry plots are shown (right). Representative of two independent experiments. \* $P < 0.001$ ; n.s., not significant. **b**, Western blot analysis of PLC $\gamma$  and LAT phosphorylation in JRT3-LES cells co-cultured with the indicated cell lines or antibodies at 37°C for the indicated times. CD3 $\epsilon$ , loading control. Representative of three independent experiments. **c**, Flow cytometry analysis of TCR downregulation (left) and CD69 upregulation (centre) by J76 cells transduced with the indicated TCRs and co-cultured with 293T.L3L8 cells or  $\alpha$ -CD3 $\epsilon$ . Data expressed as mean $\pm$ s.d. of individual co-cultures ( $n = 3$ ), normalized to 293T.EV or control IgG. Corresponding examples of raw flow cytometry plots are shown (right). Representative of three independent experiments. **d**, Flow cytometry analysis of CD1c-PC dextramer binding to human colonic  $\gamma\delta$ TCR<sup>+</sup> cells. The gate used for single-cell sorting is shown. **e**, Flow cytometry analysis of  $\gamma\delta$ TCR and CD69 expression by J76-mo8 and J76-mo5 cells after co-culture with the indicated cell lines. Representative of three individual co-cultures, related to Fig. 7e. **e**, Western blot analysis of PLC $\gamma$  and LAT phosphorylation in J76-mo8 cells co-cultured with the indicated cell lines or antibodies at 37°C for 10 min. CD247, loading control. Representative of three (PLC $\gamma$ ) and two (LAT) independent experiments.



| V usage                    | Clone #         | CDR3 $\gamma$                            | CDR3 $\delta$                                                                                       |
|----------------------------|-----------------|------------------------------------------|-----------------------------------------------------------------------------------------------------|
| V $\gamma$ 7V $\delta$ 7   | 1               | ASW <b>R</b> YSSGFHKV                    | AMLATDKLV                                                                                           |
|                            | <b>2 (mo7)</b>  | <b>ASWGYSSGFHKV</b>                      | <b>AMGATDKLV</b>                                                                                    |
|                            | 3               | ASW <b>G</b> YSSGFHKV                    | A <b>I</b> YRF <b>T</b> DKLV                                                                        |
|                            | 4               | ASW <b>GR</b> YSSGFHKV                   | A <b>I</b> Y <b>R</b> S <b>T</b> DKLV                                                               |
|                            | 5               | ASWA <b>Q</b> YSSGFHKV                   | A <b>V</b> G <b>W</b> GDKLV                                                                         |
|                            | 6               | ASWA <b>Y</b> SSGFHKV                    | AM <b>G</b> R <b>D</b> NAKLV                                                                        |
|                            | 7               | ASW <b>V</b> YSSGFHKV                    | A <b>P</b> S <b>T</b> T <b>A</b> TDKLV                                                              |
|                            | <b>8</b>        | <b>ASWGYSSGFHKV</b>                      | <b>AWGIRATDKLV</b>                                                                                  |
|                            | <b>9</b>        | <b>ASWAGLSSGFHKV</b>                     | <b>AWGIRATDKLV</b>                                                                                  |
|                            | <b>10</b>       | <b>ASWAEYSSGFHKV</b>                     | <b>AWGIRATDKLV</b>                                                                                  |
|                            | 11              | ASWA <b>G</b> YSSGFHKV                   | AM <b>P</b> R <b>D</b> ATDKLV                                                                       |
|                            | 12              | ASWA <b>G</b> YSSGFHKV                   | AM <b>G</b> R <b>G</b> T <b>T</b> DKLV                                                              |
|                            | 13              | ASWA <b>P</b> YSSGFHKV                   | A <b>R</b> I <b>S</b> E <b>G</b> Y <b>D</b> DKLV                                                    |
|                            | 14              | ASW <b>E</b> YSSGFHKV                    | A <b>Y</b> R <b>R</b> D <b>T</b> S <b>T</b> DKLV                                                    |
|                            | 15              | ASWA <b>E</b> <b>G</b> <b>G</b> YSSGFHKV | A <b>C</b> L <b>Y</b> R <b>R</b> D <b>T</b> DKLV                                                    |
|                            | 16              | ASWA <b>L</b> YSSGFHKV                   | AM <b>V</b> G <b>G</b> I <b>R</b> VDKLV                                                             |
|                            | <b>17 (mo6)</b> | <b>ASWALSSGFHKV</b>                      | <b>AMGYRRD<b>T</b>DKLV</b>                                                                          |
|                            | 18              | ASWA <b>Y</b> SSGFHKV                    | AM <b>L</b> P <b>R</b> D <b>T</b> S <b>S</b> DKLV                                                   |
|                            | 19              | ASW <b>G</b> YSSGFHKV                    | A <b>T</b> Y <b>R</b> R <b>D</b> T <b>G</b> TDKLV                                                   |
|                            | 20              | ASWA <b>H</b> SSGFHKV                    | AM <b>V</b> P <b>Y</b> R <b>R</b> D <b>T</b> DKLV                                                   |
|                            | 21              | ASWA <b>G</b> <b>R</b> <b>G</b> SSGFHKV  | AM <b>V</b> D <b>I</b> G <b>G</b> I <b>N</b> TDKLV                                                  |
|                            | <b>22</b>       | <b>ASWAYSSGFHKV</b>                      | <b>AMERISEGYELGKLV</b>                                                                              |
|                            | 23              | ASWA <b>E</b> YSSGFHKV                   | AM <b>E</b> Q <b>V</b> A <b>G</b> G <b>I</b> R <b>T</b> DKLV                                        |
|                            | 24 (mo8)        | ASWA <b>G</b> YSSGFHKV                   | AM <b>E</b> R <b>W</b> E <b>G</b> Y <b>E</b> L <b>T</b> DKLV                                        |
|                            | 25              | ASW <b>E</b> YSSGFHKV                    | AM <b>A</b> I <b>Y</b> R <b>R</b> D <b>T</b> R <b>A</b> TDKLV                                       |
| V $\gamma$ 7V $\delta$ 2-2 | 26              | ASWA <b>G</b> <b>G</b> <b>G</b> SSGFHKV  | AL <b>L</b> E <b>G</b> P <b>L</b> S <b>S</b> DKLV                                                   |
|                            | 27              | ASW <b>T</b> YSSGFHKV                    | AL <b>M</b> A <b>S</b> E <b>G</b> Y <b>A</b> DKLV                                                   |
|                            | 28              | ASWA <b>G</b> YSSGFHKV                   | AL <b>M</b> E <b>R</b> <b>G</b> R <b>G</b> I <b>A</b> DKLV                                          |
|                            | <b>29 (mo3)</b> | <b>ASWARYSSGFHKV</b>                     | <b>ALMGIGGLATDKLV</b>                                                                               |
|                            | 30              | ASWA <b>G</b> <b>G</b> <b>G</b> SSGFHKV  | AL <b>M</b> E <b>R</b> <b>G</b> E <b>G</b> Y <b>E</b> I <b>T</b> DKLV                               |
|                            | <b>31 (mo4)</b> | <b>ASWAGYSSGFHKV</b>                     | <b>ALMERGTEGYATDKLV</b>                                                                             |
|                            | 32              | ASWA <b>V</b> YSSGFHKV                   | AL <b>M</b> E <b>R</b> <b>G</b> T <b>E</b> G <b>Y</b> E <b>L</b> S <b>D</b> DKLV                    |
|                            | <b>33 (mo5)</b> | <b>ASWAGYSSGFHKV</b>                     | <b>ALMERGRRD<b>T</b>SLTDKLV</b>                                                                     |
|                            | 34              | ASWA <b>G</b> P <b>L</b> YSSGFHKV        | AL <b>M</b> E <b>R</b> <b>V</b> G <b>G</b> I <b>R</b> A <b>W</b> S <b>D</b> DKLV                    |
|                            | 35              | ASWA <b>G</b> GSSGFHKV                   | A <b>I</b> M <b>E</b> G <b>G</b> A <b>Y</b> R <b>R</b> D <b>T</b> S <b>S</b> DKLV                   |
|                            | 36              | ASWA <b>G</b> DSSGFHKV                   | AL <b>M</b> E <b>R</b> <b>V</b> G <b>G</b> I <b>R</b> V <b>P</b> C <b>P</b> DKLV                    |
|                            | 37              | ASWA <b>L</b> YSSGFHKV                   | AL <b>M</b> E <b>R</b> Y <b>I</b> G <b>G</b> I <b>R</b> A <b>W</b> G <b>T</b> DKLV                  |
|                            | 38              | ASWA <b>G</b> YSSGFHKV                   | AL <b>M</b> E <b>R</b> <b>G</b> L <b>Y</b> R <b>R</b> D <b>T</b> S <b>L</b> G <b>D</b> K <b>M</b> V |
| V $\gamma$ 7V $\delta$ 6D2 | 39              | ASWA <b>D</b> SSGFHKV                    | AL <b>S</b> E <b>Q</b> G <b>H</b> I <b>Y</b> T <b>T</b> D <b>K</b> F <b>V</b>                       |
|                            | 40 (mo2)        | ASWA <b>D</b> SSGFHKV                    | AL <b>S</b> E <b>L</b> S <b>E</b> G <b>Y</b> E <b>P</b> A <b>T</b> DKLV                             |
|                            | 41              | ASWA <b>G</b> YSSGFHKV                   | AL <b>S</b> E <b>L</b> I <b>L</b> T <b>G</b> G <b>I</b> R <b>A</b> TDKLV                            |
|                            | <b>42 (mo1)</b> | <b>ASWAYSSGFHKV</b>                      | <b>ALSEPWHIGGIRATDKLV</b>                                                                           |
|                            | 43              | ASWA <b>G</b> YSSGFHKV                   | AL <b>S</b> E <b>L</b> I <b>G</b> A <b>Y</b> R <b>R</b> D <b>T</b> S <b>S</b> DKLV                  |

**Supplementary Table 1. Murine  $\gamma\delta$ TCR chain pairs identified through the single-cell analysis**

Paired CDR3 $\gamma/\delta$  amino acid sequences (red, non-germline-encoded) identified by single-cell TCR sequencing of Btntl+6-responding murine primary V $\gamma$ 7<sup>+</sup> IEL. Paired sequences for which both CDR3 $\gamma$  and  $\delta$  were found in the deep sequencing analysis are depicted in bold.

| <b>Single cell PCR</b>           |     |                                |
|----------------------------------|-----|--------------------------------|
| <b>External primer sets</b>      |     |                                |
| mV $\gamma$ 7                    | For | ATGCTGTGGGCTCTGG               |
| mC $\gamma$ 1                    | Rev | TTAGGATTTCTTCTCATTGCCACAG      |
| mV $\delta$ 2-2                  | For | ATGGTGCGGCCGTTTC               |
| mV $\delta$ 6D                   | For | ATGGCTCCTCAGAGCCTG             |
| mV $\delta$ 7                    | For | ATGGAGAGGCTGCTGTGCTCTC         |
| mC $\delta$                      | Rev | TTACAAGAAAAATAACTTGGCAGTCAAGAG |
| hV $\gamma$ 2/3/4                | For | ATG <b>G</b> AGTGGGCCCTAGCG    |
| hC $\gamma$ 1/2                  | Rev | TTATGATTTCTTCTCCATTGCAGCAG     |
| hV $\delta$ 1                    | For | ATGCTGTTCTCCAGCCTGCTG          |
| hV $\delta$ 3                    | For | ATGATTCTTACTGTGGGCTTTAGCTTTTTG |
| hC $\delta$                      | Rev | TTACAAGAAAAATAACTTGGCAGTCAAGAG |
| <b>Internal primer sets</b>      |     |                                |
| mV $\gamma$ 7                    | For | TGAAGGCCCGGACAAGAG             |
| mC $\gamma$ 1                    | Rev | TGTGCTCTTTCCCATTC              |
| mV $\delta$ 2-2                  | For | TGCAACGTTAAACCGCTTCTC          |
| mV $\delta$ 6D                   | For | AAATCCATCAGCCTTGTCATTTTC       |
| mV $\delta$ 7                    | For | AAGCACACTGGAAGACTGACATCC       |
| mC $\delta$                      | Rev | GTCGAATTCACAATCTTCTTGG         |
| hV $\gamma$ 2-8                  | For | CACTGGTACCTACACCAGGAGG         |
| hC $\gamma$ 1/2                  | Rev | GGAGGAGGTACATGTAATATGCAGAG     |
| hV $\delta$ 1                    | For | GGTACAAGCAACTTCCCAGCAAAG       |
| hV $\delta$ 3                    | For | ACCGGATAAGGCAAGATTATTCC        |
| hC $\delta$                      | Rev | GGCAGCTCTTTGAAGGTTGC           |
| <b>Other cloning primer sets</b> |     |                                |
| mV $\gamma$ 5                    | For | ATGTCAACCTCTTGGCTTTTTTC        |
| mV $\delta$ 1                    | For | ATGCTTTGGAGATGTCCAGTC          |
| hV $\gamma$ 9                    | For | ATGGTGTCACTGCTCCACACATC        |
| hV $\delta$ 2                    | For | ATGCAGAGGATCTCCTCCCTCAT        |
| EPCR                             | For | GGAGCCTCAACTTCAGGATG           |
| EPCR                             | Rev | TTAACATCGCCGTCCACC             |
| T22                              | For | ATGTCCTGGGTCTCAGGG             |
| T22                              | Rev | TCAAGGTGACAGTAAAGACTCGCC       |
| <b>Sequencing primers</b>        |     |                                |
| mC $\gamma$ 1                    | Rev | CCAGGATAGTATTGCCATCC           |
| mC $\delta$                      | Rev | CAGACAAGCAACATTTGTTCC          |
| hC $\gamma$                      | Rev | GCAGTAGTGTATCATTTGCATC         |
| hC $\delta$                      | Rev | GGTTTTACGTGATCTGTAGAATCTGTC    |

**Supplementary Table 2. List of primers used in this study.**

All sequences read 5' to 3'. For cloning of the human V $\gamma$  chains downstream of the IRES an NcoI restriction site (C<sup>^</sup>CATGG) was introduced by mutating the first nucleotide downstream of the start codon (bold red).
